# Supplementary material for: Enhanced visible-light-induced photocatalytic activity of anatase TiO2 nanocrystallite derived from CMK-3 and tetrakis(dimethylamino)titanium
Source: Royal Society of Chemistry journal article supplement (doi:10.1039/c6ra02655a), 2016-01-01
Supplement: c6ra02655a1.pdf [file c6ra02655a1.pdf]

## Electronic Supplementary Information

### Enhanced visible-light-induced photocatalytic activity of anatase TiO<sub>2</sub> nanocrystallite derived from CMK-3 and tetrakis (dimethylamino) titanium

Xiaoyin Zhang<sup>a,b</sup>, Ye Zhang<sup>a\*</sup>, Dawei Liu<sup>a,b</sup>, Junpeng Feng<sup>a,b</sup>, Ligong Zhou<sup>a</sup>, Ying Yang<sup>a</sup>, Xiangyun

Guo<sup>a</sup>, Xuekuan Li<sup>a</sup>

<sup>a</sup>Institute of Coal Chemistry, Chinese Academy of Sciences, Taiyuan 030001, PR China

<sup>b</sup>University of Chinese Academy of Sciences, Beijing 100049, PR China

\*Corresponding author:

yzhang@sxicc.ac.cn (Ye Zhang), TEL: +8613485339977

### Synthesis of SBA-15:

SBA-15 was prepared using the triblock copolymer,  $\text{EO}_{20}\text{PO}_{70}\text{EO}_{20}$  (Pluronic P123, Aldrich), as the surfactant and tetraethyl orthosilicate (TEOS, 98%, Acros) as the silica source, following the synthesis procedure reported by Zhao et al. In a typical synthesis, 2 g of nonionic tri-block copolymer surfactant  $\text{EO}_{20}\text{PO}_{70}\text{EO}_{20}$  (P123) was dispersed in 60 ml of 2M HCl solution under stirring at 37 °C until a clear solution was obtained. Then, 0.021 mol of TEOS were added to the above solution and the contents were stirred at 37 °C for 24 h, then the complex was put into an oven and aged at 80 °C for 48 h. The obtained suspension was filtered, dried at 80 °C overnight and finally calcined at 550 °C for 4 h to remove the template. The small-angle X-ray diffraction pattern has been depicted in Fig. S1.

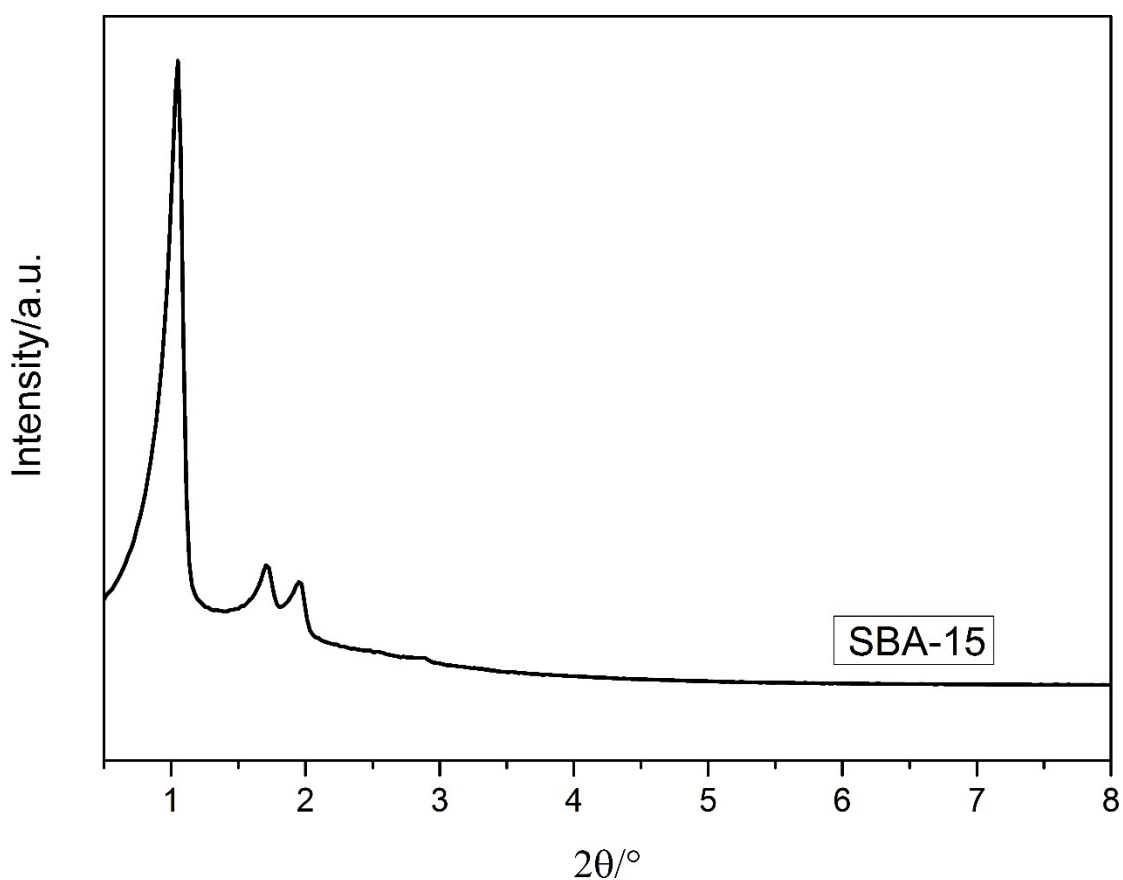

Fig. S1 small-angle X-ray diffraction pattern of SBA-15

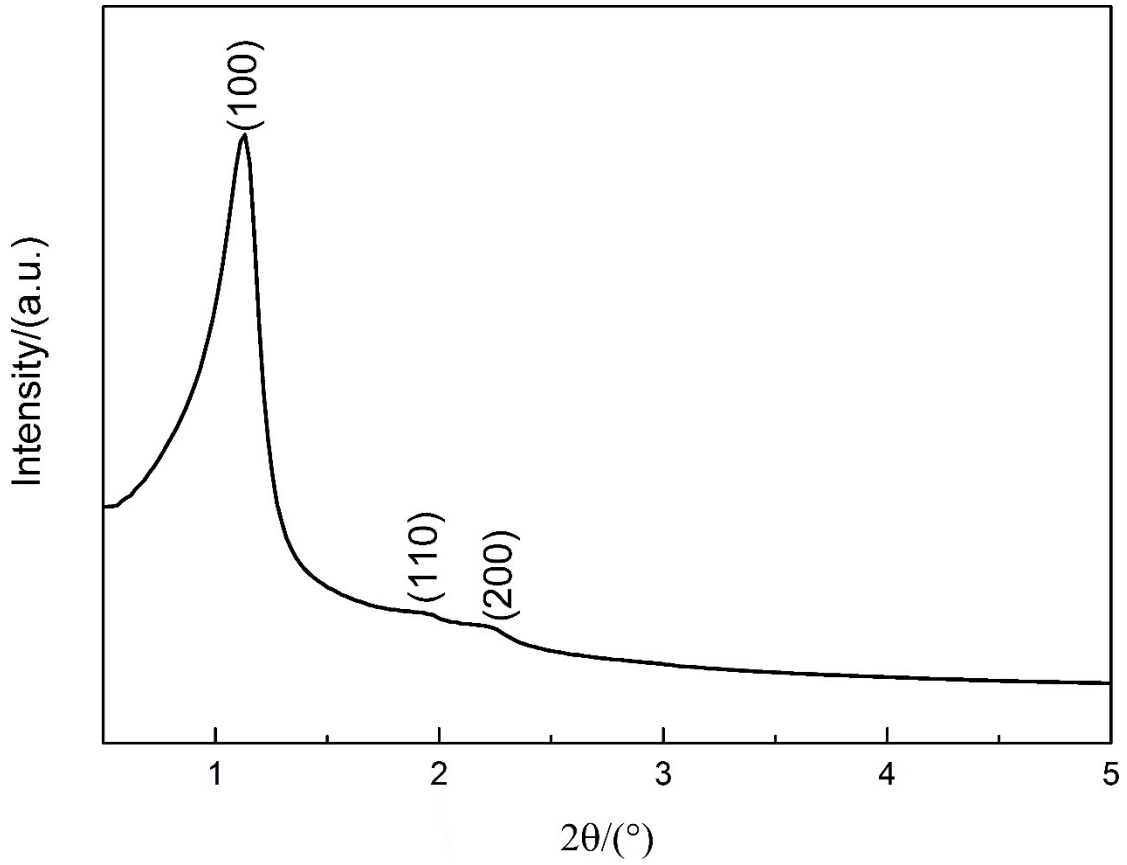

Fig. S2 Small-angle X-ray diffraction pattern of CMK-3

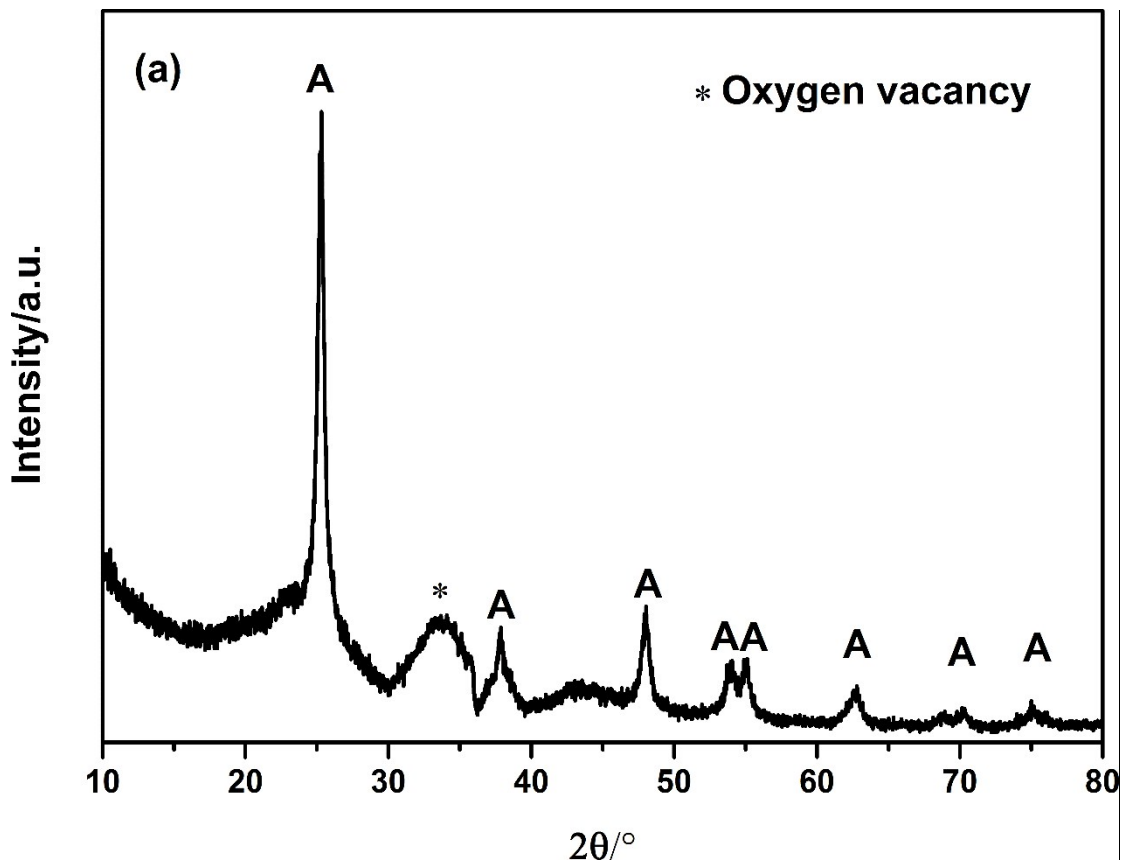

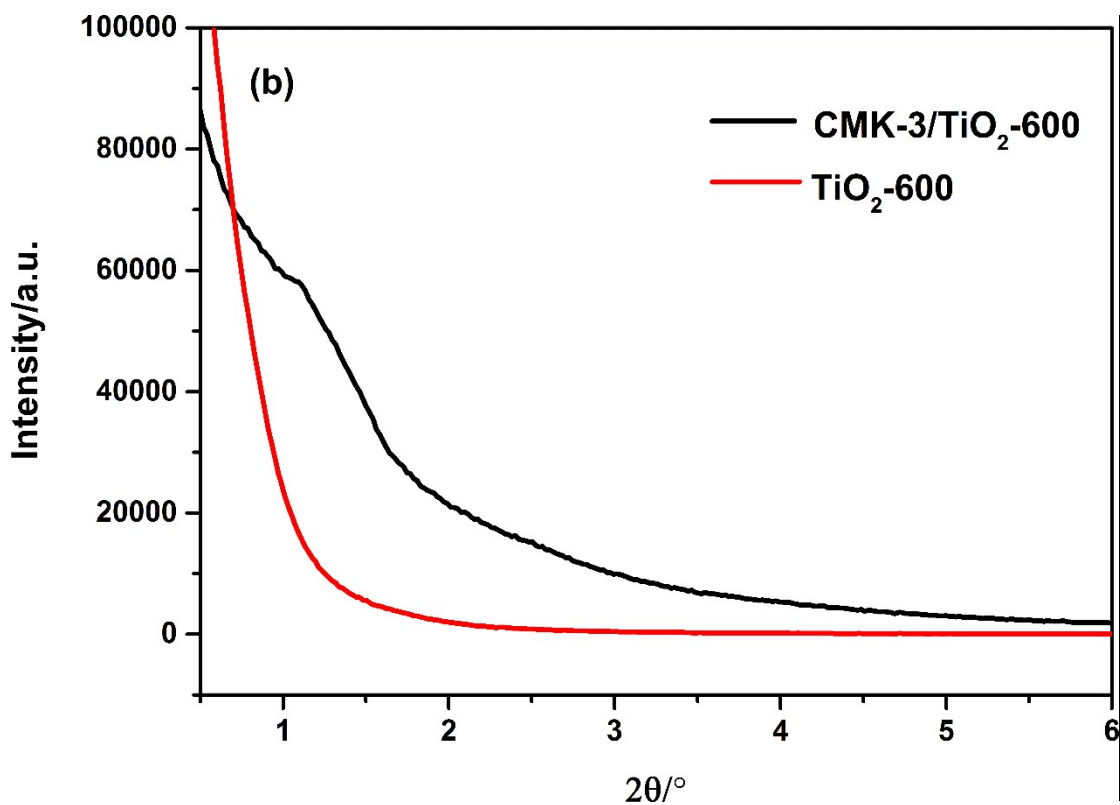

Fig. S3 Wide angle XRD pattern of CMK-3/TiO<sub>2</sub>-600 (a) and small angle X-ray diffraction patterns of TiO<sub>2</sub>-600 and CMK-3/TiO<sub>2</sub>-600 (b)

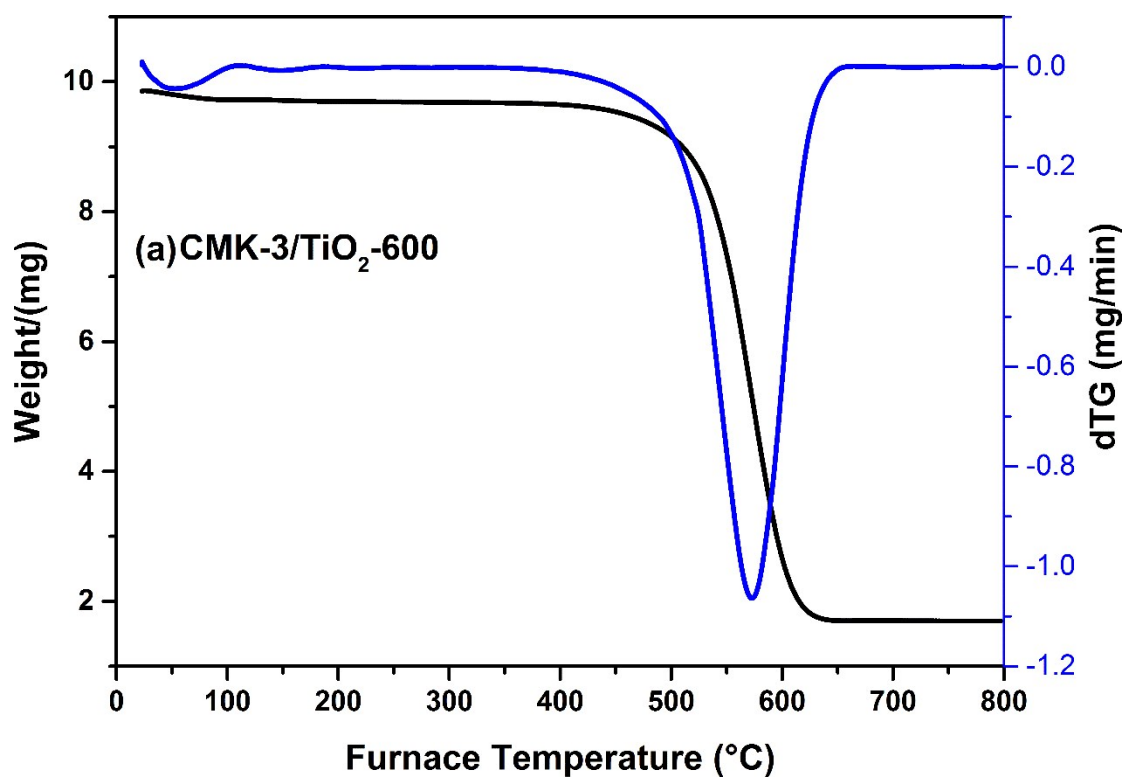

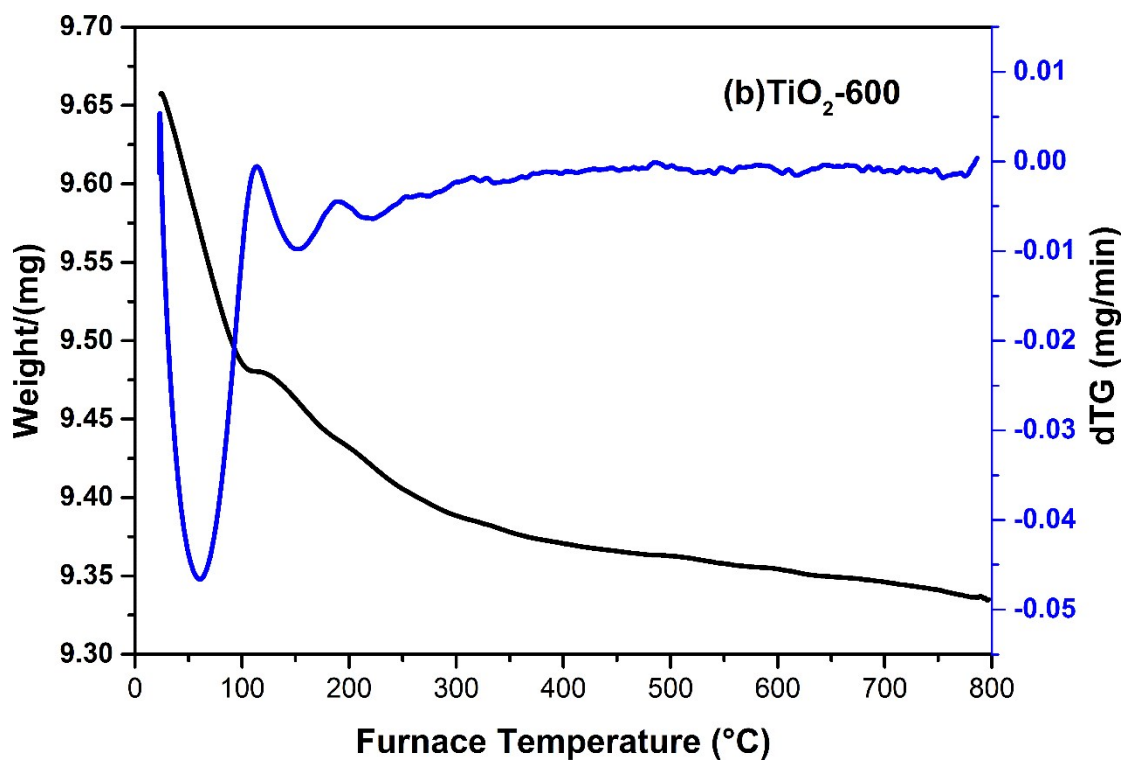

Fig. S4 Thermogravimetric analysis results of CMK-3/TiO<sub>2</sub>-600 (a) and TiO<sub>2</sub>-600 (b)

Thermogravimetric analysis results show the weightlessness of CMK-3/TiO<sub>2</sub>-600 and TiO<sub>2</sub>-600. The corresponding weightlessness were 82.55% and 1.37%, respectively and the weight loss before 150 °C could be attributed to the water loss. The calculated C/Ti molar ratio of CMK-3/TiO<sub>2</sub>-600 was 31.5, slightly less than the original C/Ti molar ratio of 36.5:1, which can be attributed to the slight weight loss of carbon during heat treatment in inert atmosphere. In addition, the weight loss of TiO<sub>2</sub>-600 (1.37%) suggested that a little amount of carbon residual exist after calcination. The results also show that the carbon has the maximum weight loss rate at 570 °C.
